# Supplementary material
Source: publisher figshare collection journal article supplement (https://geolsoc.figshare.com/ndownloader/files/5426786)
Supplement: Supplementary file 1 [file 5426786]

dist	40Ar	+-	39Ar	+-	38Ar	+-	37Ar	+-	36Ar	+-	40Ar/39Ar	+-	Age (Ma)	+-
20	676.9000	0.8092	4.1000	0.0721	0.2000	0.0000	0.6400	0.0400	0.1400	0.0600	165.10	2.91	1942	22
21	640.2200	0.6803	4.2200	0.0721	0.0000	0.0400	0.5200	0.0000	0.1800	0.0600	151.71	2.60	1843	21
22	689.2200	0.5295	4.1600	0.0894	0.2600	0.0447	0.6800	0.0800	0.1200	0.0000	165.68	3.56	1947	26
23	730.6200	0.4512	4.0800	0.0894	0.1800	0.0200	0.3600	0.0894	0.1600	0.0000	179.07	3.93	2040	27
24	819.7400	0.2600	4.8800	0.0894	0.1400	0.0200	0.6400	0.0894	0.2000	0.0000	167.98	3.08	1963	23
25	761.1800	0.8412	4.8000	0.1265	0.2800	0.0400	0.5400	0.0447	0.1600	0.0400	158.58	4.18	1895	31
26	818.5800	0.8412	4.8800	0.1265	0.1200	0.0400	0.5800	0.0200	0.0000	0.0400	167.74	4.35	1961	32
27	806.2600	0.8609	5.2800	0.1265	0.1200	0.0400	0.4600	0.0447	0.0000	0.0566	152.70	3.66	1851	28
28	748.4200	1.2434	4.8000	0.0400	0.0600	0.1077	0.5200	0.0800	0.1000	0.0600	155.92	1.32	1875	12
29	797.3000	1.2304	5.1200	0.0000	0.1000	0.1000	0.4400	0.0800	0.0000	0.0600	155.72	0.24	1874	6
30	796.8200	1.2259	5.0800	0.0400	-0.0600	0.1000	0.5200	0.0894	0.0000	0.0600	156.85	1.26	1882	11
31	762.7800	0.6403	4.7600	0.0000	0.2000	0.0000	0.5800	0.1077	0.1000	0.0200	160.25	0.13	1907	6
32	763.9800	0.5546	4.8000	0.0400	0.0800	0.0000	0.5000	0.1000	0.0200	0.0200	159.16	1.33	1899	11
33	770.9800	0.6096	4.7400	0.0447	0.1600	0.0000	0.5400	0.0600	0.0000	0.0400	162.65	1.54	1925	13
34	758.1800	0.6648	4.9400	0.0447	0.1200	0.0000	0.5400	0.0600	0.0800	0.0400	153.48	1.40	1857	12
35	688.2200	0.6096	4.4200	0.0447	0.0800	0.0000	0.5800	0.0600	0.1200	0.0400	155.71	1.58	1873	13
36	803.5800	1.0263	4.7600	0.0566	0.3000	0.0600	0.8000	0.0400	0.2000	0.0000	168.82	2.02	1969	16
37	720.1000	0.9176	4.4800	0.0894	0.1000	0.0600	0.6400	0.0566	0.1200	0.0000	160.74	3.22	1911	24
